# Supplementary material for: Dosage delivery of chiral ruthenium catalysts using non-ionic surfactants for asymmetric transfer hydrogenation reactions in aqueous media
Source: Royal Society of Chemistry journal article supplement (doi:10.1039/d2re00335j), 2022-10-31
Supplement: d2re00335j1.pdf [file d2re00335j1.pdf]

# Dosage Delivery of Chiral Ruthenium Catalysts Using Non-Ionic Surfactants for Asymmetric Transfer Hydrogenation Reactions in Aqueous Media

Bengi Özgün ÖZTÜRK<sup>[a]\*</sup>, Miray AKLAN<sup>[a]</sup>, Solmaz KARABULUT ŞEHİTOĞLU<sup>[a]</sup>

[a] Hacettepe University, Faculty of Science, Chemistry Department, 06800, Beytepe-ANKARA, TURKEY  
Corresponding author E-mail: [bengi04@hacettepe.edu.tr](mailto:bengi04@hacettepe.edu.tr)

## SUPPORTING INFORMATION

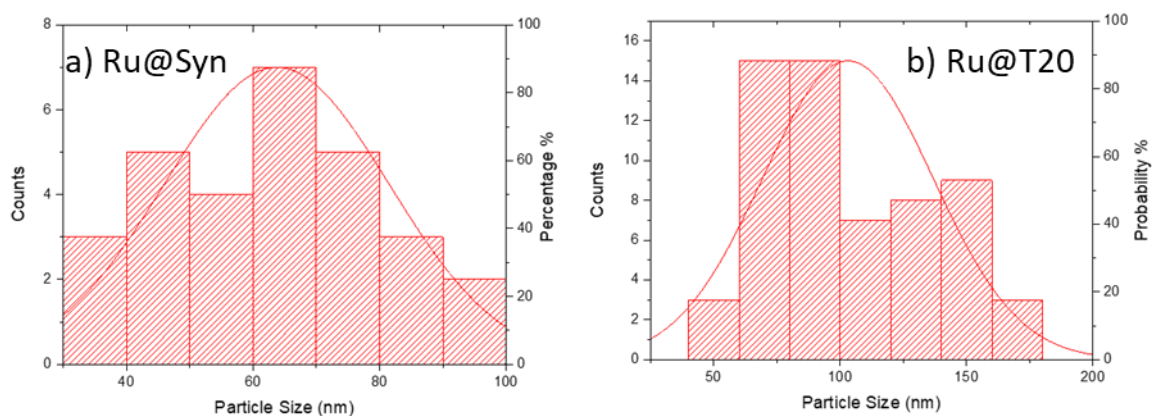

**Scheme S1.** Particle size distribution of Ru@Syn and Ru@T20 in water (Obtained from high contrast TEM images)

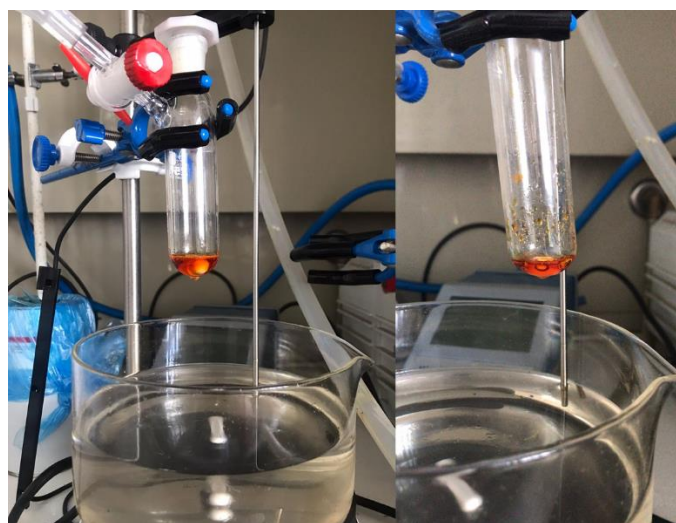

**Scheme S2.** The preparation of Ru@Syn at 70 °C

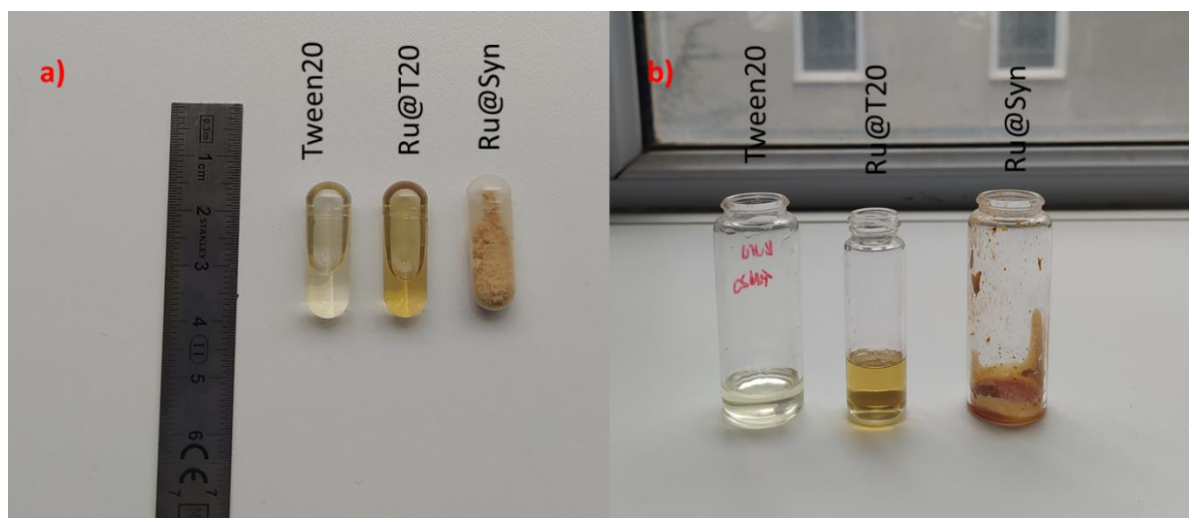

**Scheme S3.** a) Tween@20, Ru@T20 and Ru@Syn in cellulose capsules b) Freshly prepared Ru@T20 and Ru@Syn in glass vials

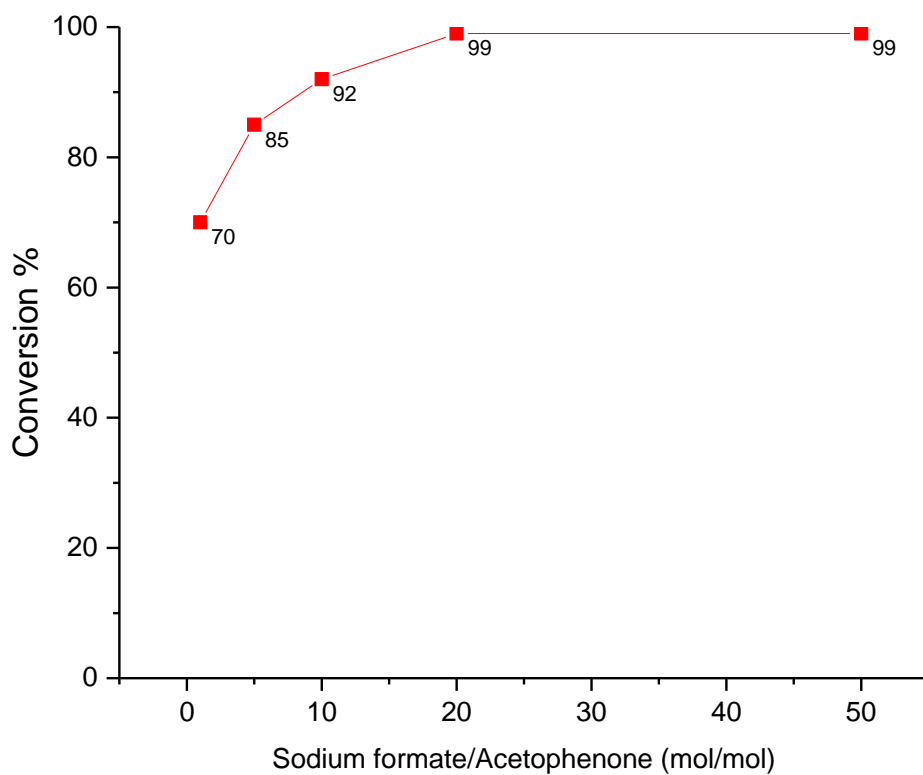

**Scheme S4.** The effect of sodium formate/acetophenone ratio on ATH of acetophenone using 1 mol % Ru ( Ru@Syn) in water at 80 °C.

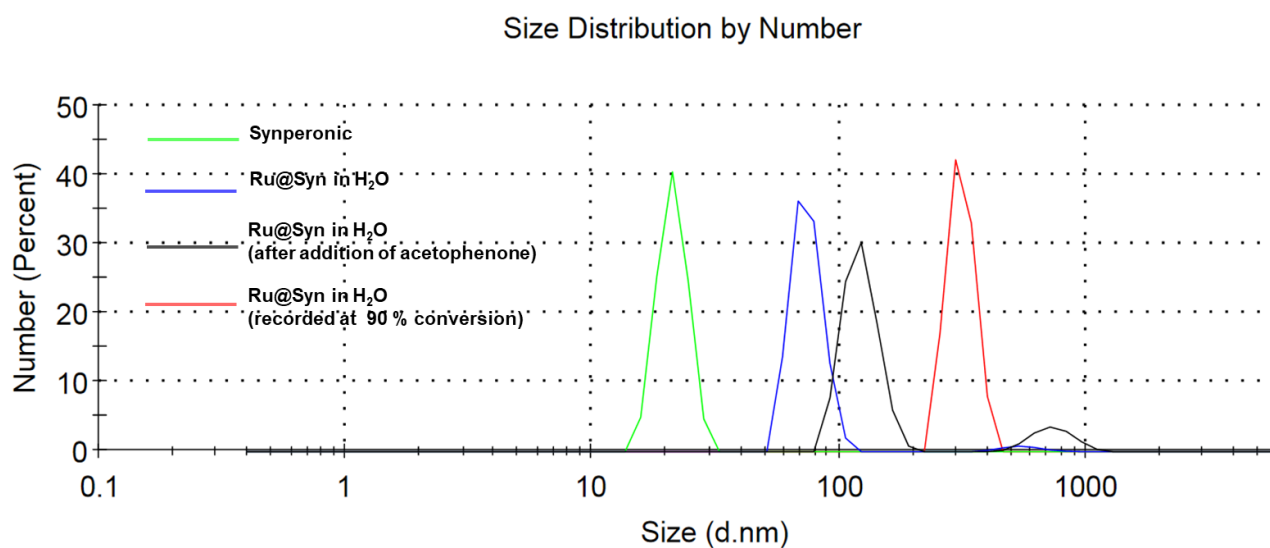

**Scheme S5.** DLS analysis of the reaction mixture during ATH of acetophenone in water ( Reaction conditions: Acetophenone/Sodium Formate/Ru; 100/2000/1 (mol/mol/mol). The reaction was carried out at 80 °C. The samples withdrawn from the mixture was analyzed by DLS)

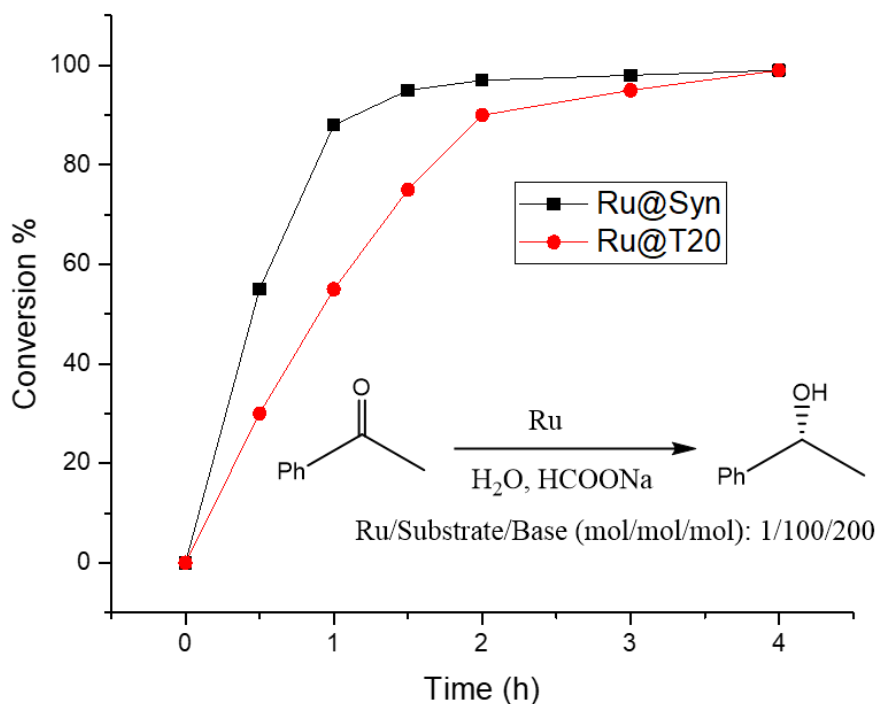

**Scheme S6.** Kinetics of ATH reactions of acetophenone using Ru@T20 and Ru@Syn

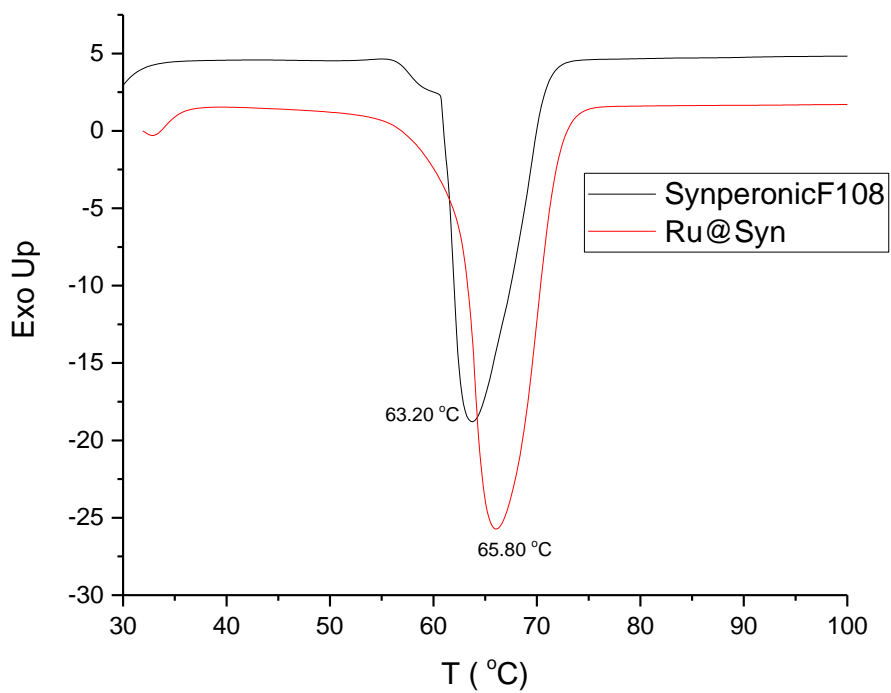

**Scheme S7.** DSC thermogram of Synperonic®F108 and Ru@Syn

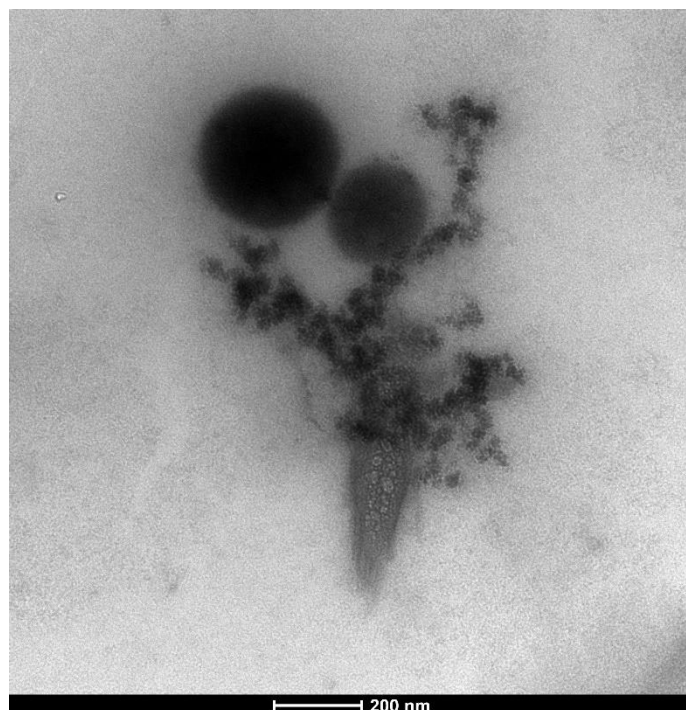

**Scheme S8.** High contrast TEM image of Ru@Syn after 8<sup>th</sup> run. As can be seen in TEM image, the nanoparticles were started to form non-uniform cluster like structures

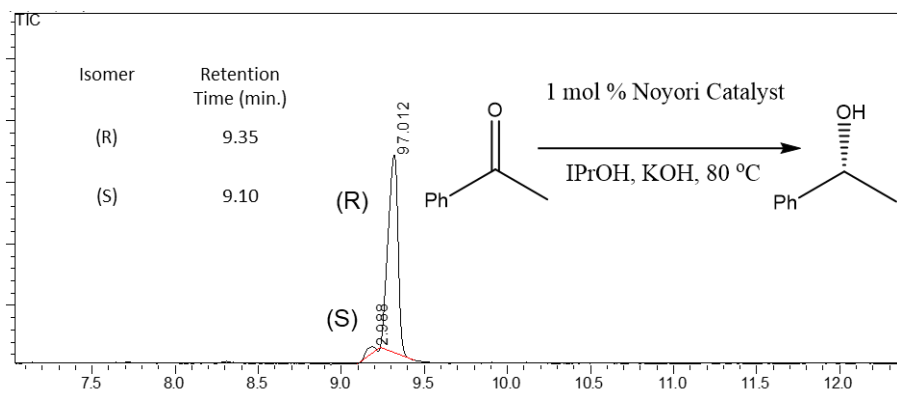

**Scheme S9.** Chiral GC analysis of ATH reactions using acetophenone (S1) in IPrOH using Noyori catalyst

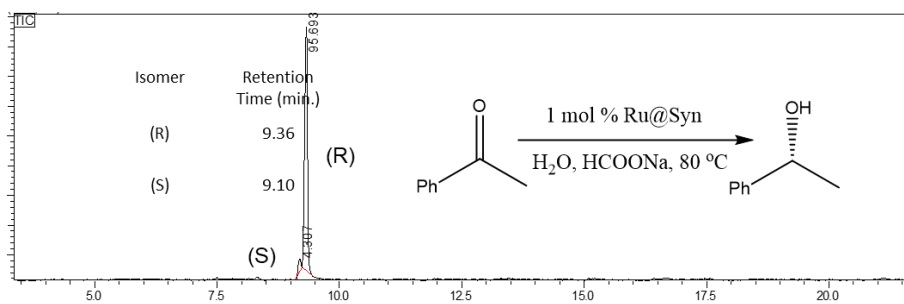

**Scheme S10.** Chiral GC analysis of ATH reactions using acetophenone (S1)

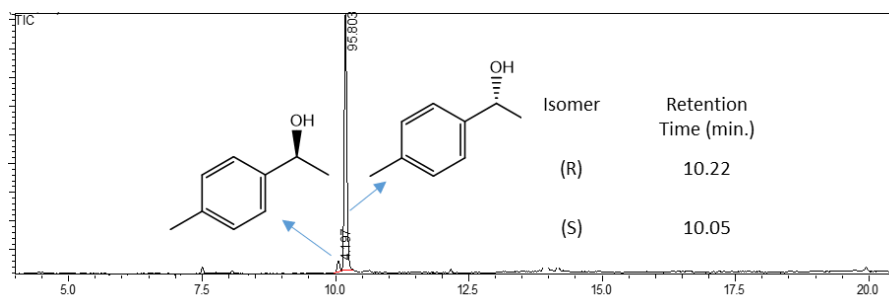

**Scheme S11.** Chiral GC analysis of ATH reactions using 4-methylacetophenone (S2)

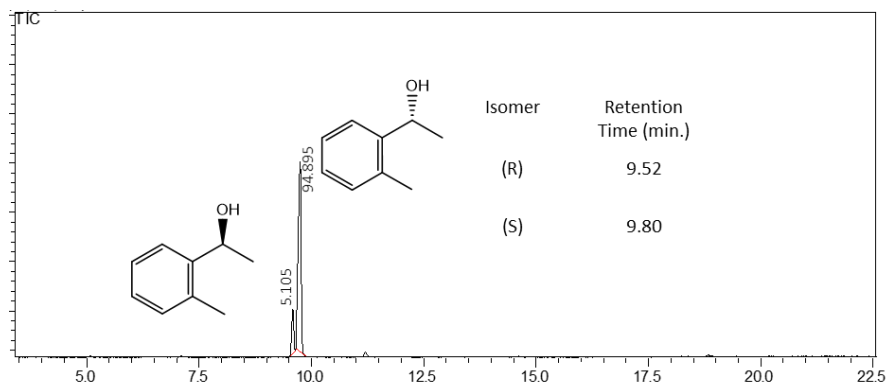

**Scheme S12.** Chiral GC analysis of ATH reactions using 2-methylacetophenone (S3)

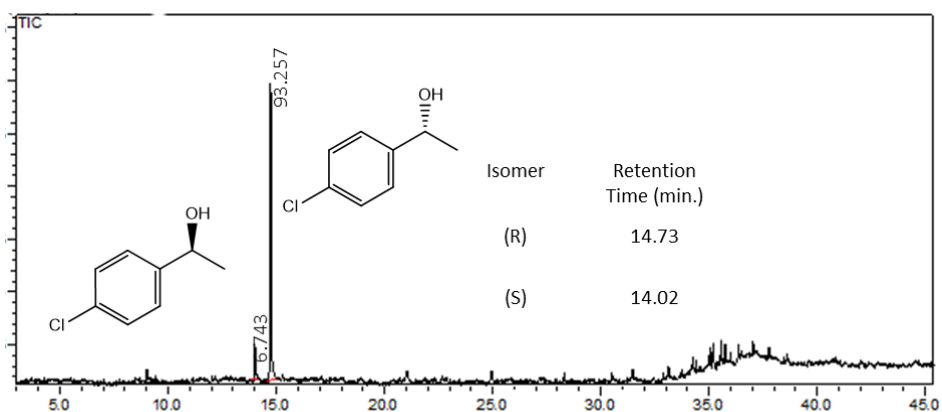

**Scheme S13.** Chiral GC analysis of ATH reactions using 4-chloroacetophenone (S4)

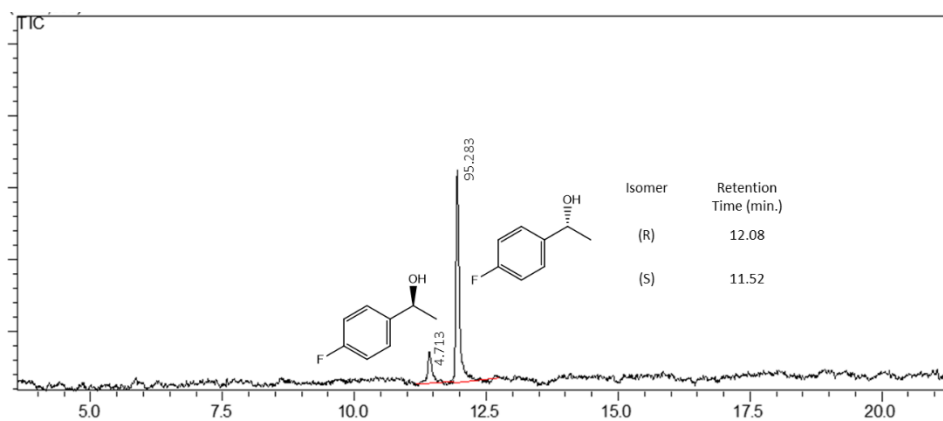

**Scheme S14.** Chiral GC analysis of ATH reactions using 4-fluoroacetophenone (S5)
